# Supplementary material for: Response to Learned Threat: An fMRI Study in Adolescent and Adult Anxiety
Source: Atypon-hosted journal article supplement (doi:10.1176/appi.ajp.2013.12050651), 2013-08-09

## FEAR ACQUISITION

## EXTINCTION

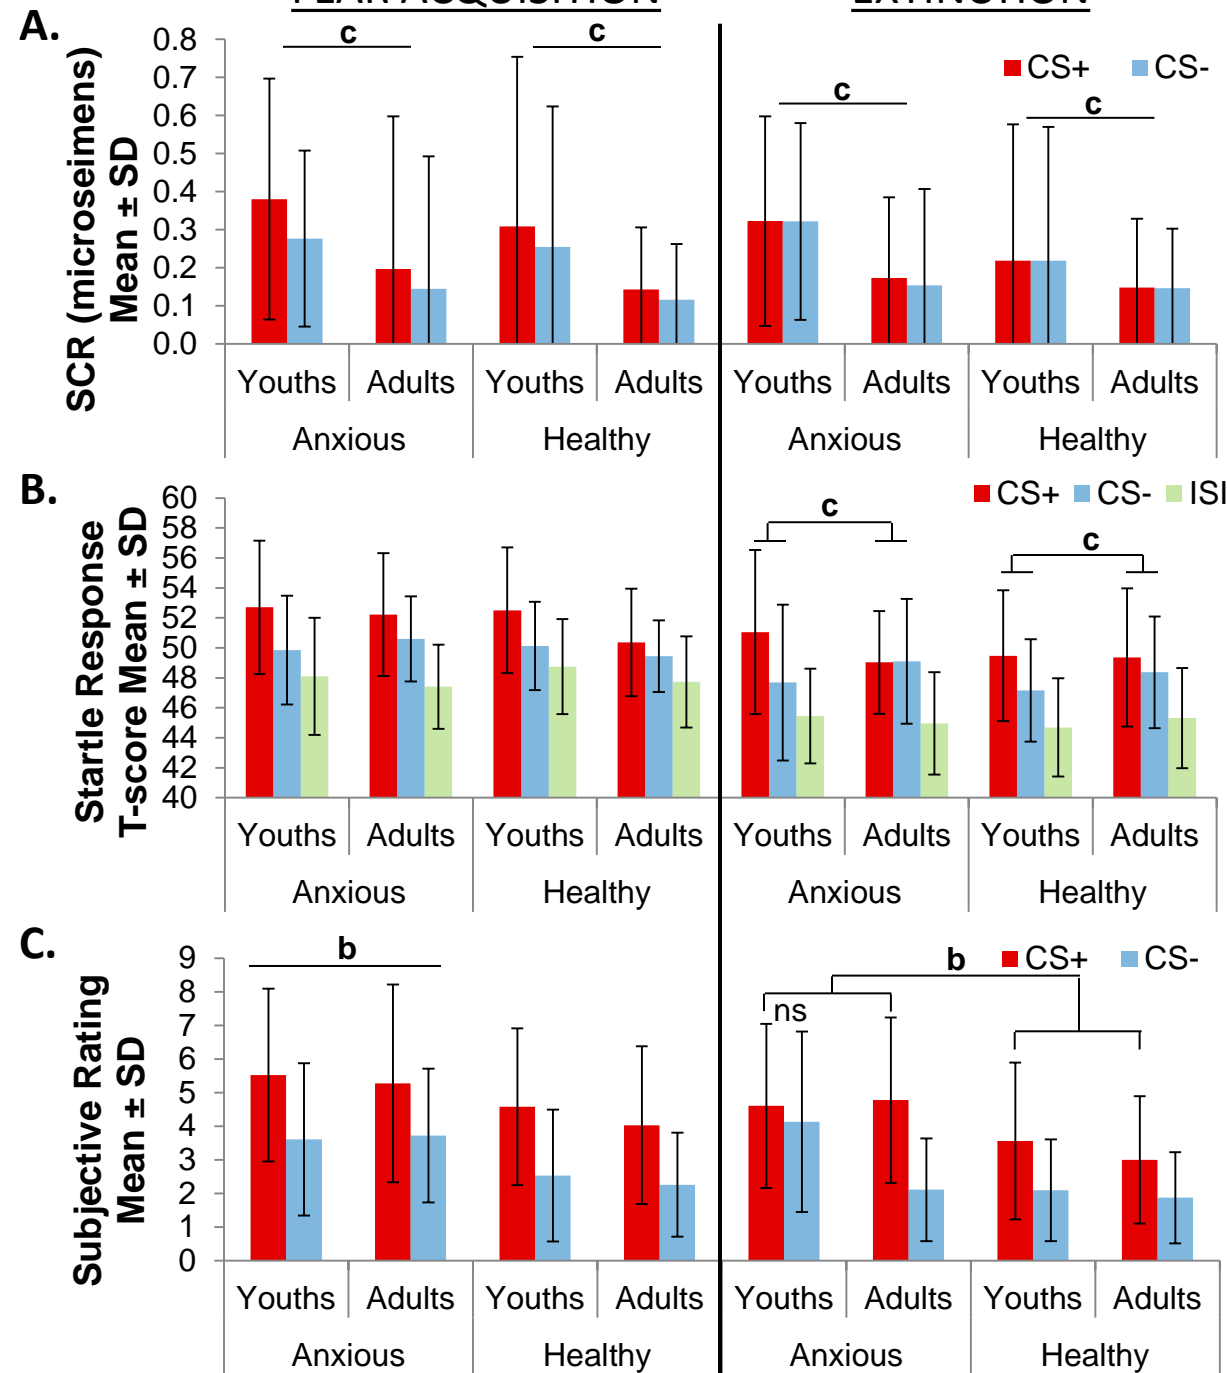

**Supplementary Figure 1: Subjective and psychophysiological measures of fear acquisition and extinction.<sup>a</sup>**

<sup>a</sup> A) Normalized (square-root transform) skin conductance response (SCR) B) Standardized fear potentiated startle measured through electromyography (EMG) of the eyeblink reflex C) Subjective ratings of anxiety. CS+=conditioned stimulus paired with unconditioned stimulus (UCS), CS-=conditioned stimulus never paired with UCS, ISI=Inter-stimulus interval. Data from 23 anxious youths, 18 anxious adults, 42 healthy youths and 31 healthy adults are summarized. Significance is defined as  $\alpha=0.05$ .

<sup>b</sup> Anxiety-related difference.

<sup>c</sup> Age-group difference.

Overall, SCR was greater in youths than adults [all  $F(1,96)>12.7$ ,  $p<0.02$ ] and the reported fear was greater in anxious than healthy individuals [ $F(1,109)=19.3$ ,  $p<0.001$ ]. During fear acquisition, fear conditioning (CS+>CS-) was demonstrated in all measures [SCR: mean difference between CS+ and CS-= 0.1,  $t(99)=4.8$ ,  $p<0.001$ , EMG: mean difference between CS+ and CS-=2.0,  $t(113)=4.3$ ,  $p<0.001$ , subjective fear: mean difference between CS+ and CS-=1.9,  $t(113)=7.9$ ,  $p<0.001$ ; all group effects  $p>0.1$ ]. During extinction, the EMG response to CS+ and CS- were more similar in adults than in youths [age-group $\times$ CS-type interaction:  $F(2,220)=4.2$ ,  $p<0.02$ ] and the subjective ratings of fear were similar to those in extinction for both anxious adults and anxious youths [ $F(2,218)=4.5$ ,  $p<0.02$ ]. In addition, only anxious youths showed similar responses to the CS+ and CS-, reflecting elevated fear to the CS- [ns,  $p>0.2$ ].

**Supplementary Figure 2:** Threat appraisal and explicit memory elicit different patterns of behavioral response.<sup>a</sup>

<sup>a</sup> Averaged behavioral data demonstrate differences based on cognitive state. Data from 14 anxious youths, 15 anxious adults, 25 healthy youths, and 28 healthy adults are summarized. Significance is defined as  $\alpha=0.05$ .  
<sup>b</sup> Significant quadratic response across groups.

The quadratic pattern in the responses and reaction times to morphed images continuously varying in similarity from the CS- (0%) to CS+ (100%) is less dramatic during threat appraisal (Panels A and B, respectively) than explicit memory (Panels C, D). Subjective response: instruction×Morph<sup>2</sup>-Level interaction:  $F(2,1931)=4.2$ ,  $p<0.01$ ; threat appraisal:  $\beta=0.003$ ,  $SE=0.001$ ,  $t(899)=2.6$ ,  $p<0.001$ ; explicit memory:  $\beta=0.008$ ,  $SE=0.001$ ,  $t(899)=7.5$ ,  $p<0.001$ . Reaction time: instruction×Morph<sup>2</sup>-Level interaction:  $F(2,1960)=19.3$ ,  $p<0.01$ ; threat appraisal:  $p>0.1$ , explicit memory:  $\beta=-7.9$ ,  $SE=1.2$ ,  $t(899)=6.5$ ,  $p<0.001$ . No group differences in quadratic patterns across morphed images were noted [all  $p>0.2$ ].

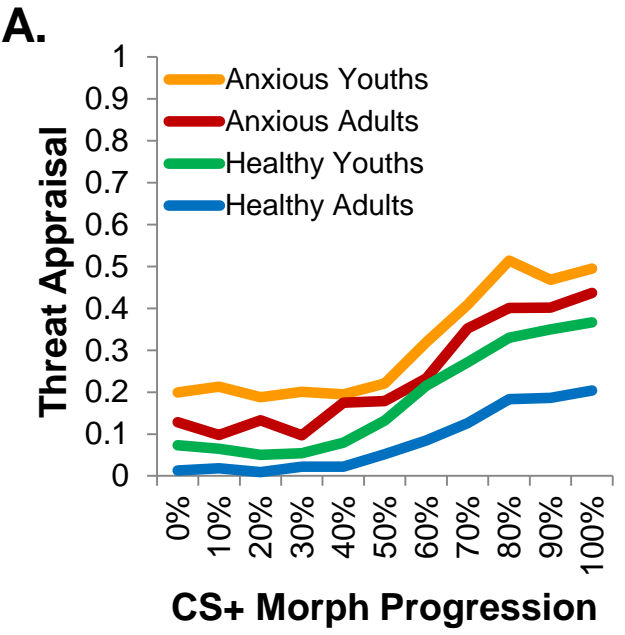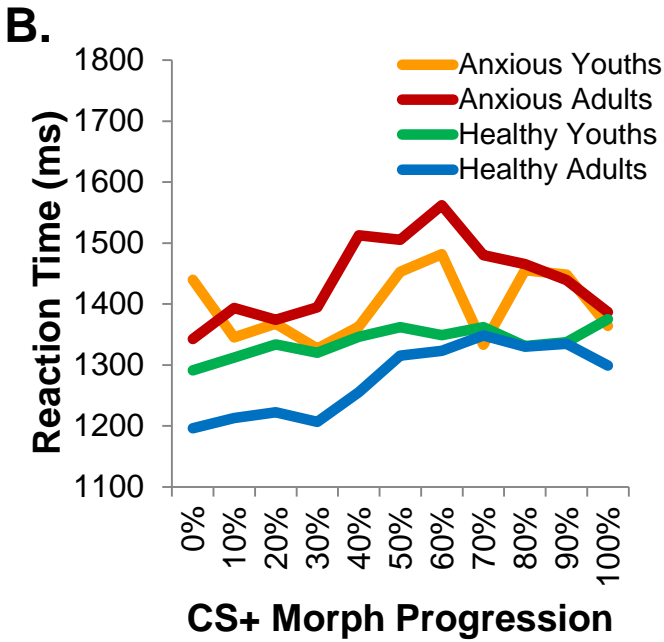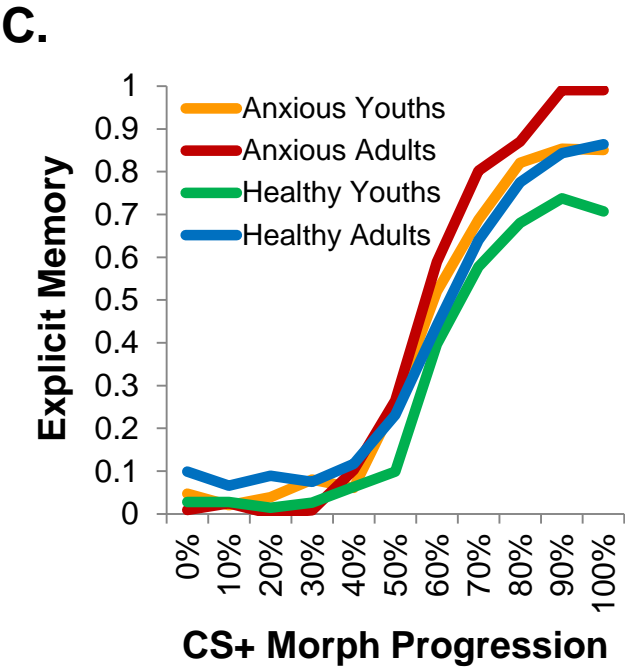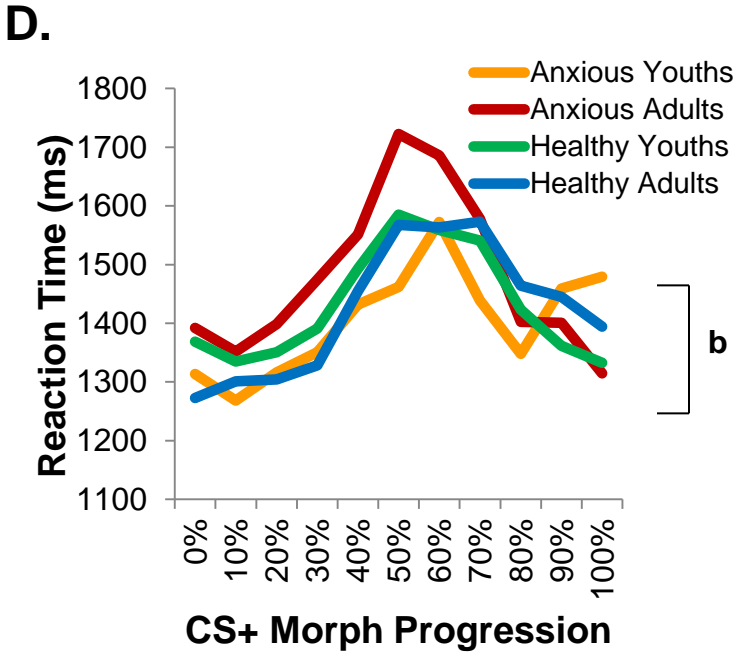

Supplement: 1195_ds002.pdf [file 1195_ds002.pdf]
